# Supplementary material for: Deep learning-based cell segmentation for rapid optical cytopathology of thyroid cancer
Source: PubMed Central journal article supplement (PMC11252353; doi:10.1038/s41598-024-64855-2), 2024-07-16
Supplement: 41598_2024_64855_MOESM1_ESM.pdf [file 41598_2024_64855_MOESM1_ESM.pdf]

*Supplementary Information for*

## **Deep learning-based cell segmentation for rapid optical cytopathology of thyroid cancer**

*Peter R. Jermain<sup>1,2</sup>, Martin Oswald<sup>3</sup>, Tenzin Langdun<sup>3</sup>, Santana Wright,<sup>1</sup> Ashraf Khan<sup>4</sup>, Thilo Stadelmann,<sup>3,5</sup> Ahmed Abdulkadir,<sup>3,6</sup> and Anna N. Yaroslavsky<sup>\*1,7</sup>*

<sup>1</sup>Advanced Biophotonics Laboratory, University of Massachusetts Lowell, Lowell, MA, United States

<sup>2</sup>Department of Radiation Medicine, MedStar Georgetown University Hospital, Washington, DC, United States

<sup>3</sup>Centre for Artificial Intelligence, Zurich University of Applied Sciences, Winterthur, Switzerland

<sup>4</sup>Department of Pathology, UMASS Chan Medical School-Baystate, Springfield, MA, United States

<sup>5</sup>ECLT European Centre for Living Technology, Venice, Italy

<sup>6</sup>University Hospital of Old Age Psychiatry and Psychotherapy, University of Bern, Bern, Switzerland

<sup>7</sup>Department of Dermatology, Massachusetts General Hospital, Boston, MA United States

\*Correspondence: [Anna\\_Yaroslavsky@uml.edu](mailto:Anna_Yaroslavsky@uml.edu)

### **This PDF file includes:**

Table S1: PTC case (sample #6)

Table S2: FTA case (sample #7)

Table S3: FTC case (sample #5)

Table S4: MTC case (sample #10)

Supplementary Methods

Table S5: Parameters of the convolutional layers in the analysis and synthesis path of the U-Net.

### **Abbreviations:**

AU – Automated

DNS – Did not segment

Fpol – Fluorescence polarization

FTA – Follicular thyroid adenoma

FTC – Follicular thyroid carcinoma

MA – Manual

MTC – Medullary thyroid carcinoma

N/A – Not applicable

PTC – Papillary thyroid carcinoma

**Supplementary Table S1. PTC case (sample #6)**

| Cell No. (MA) | Cell No. (AU) | Fpol (MA) | Fpol (AU) | Fpol % Difference (MA versus AU) | Cell Area (MA) ( $\mu\text{m}^2$ ) | Cell Area (AU) ( $\mu\text{m}^2$ ) | Cell Area % Difference (MA versus AU) |
|---------------|---------------|-----------|-----------|----------------------------------|------------------------------------|------------------------------------|---------------------------------------|
| 1             | 3             | 0.283     | 0.291     | 2.7%                             | 22.2                               | 19.9                               | -11.1%                                |
| 2             | 4             | 0.272     | 0.285     | 4.6%                             | 17.8                               | 13.0                               | -37.2%                                |
| 3             | 5             | 0.259     | 0.266     | 2.6%                             | 18.6                               | 18.0                               | -3.2%                                 |
| 4             | 6             | 0.255     | 0.265     | 3.8%                             | 14.6                               | 13.5                               | -8.3%                                 |
| 5             | 7             | 0.277     | 0.280     | 1.1%                             | 18.6                               | 17.5                               | -6.5%                                 |
| 6             | 8             | 0.254     | 0.269     | 5.6%                             | 14.3                               | 9.6                                | -48.6%                                |
| 7             | 9             | 0.287     | 0.296     | 3.0%                             | 21.5                               | 18.0                               | -19.5%                                |
| 8             | 10            | 0.295     | 0.308     | 4.2%                             | 19.3                               | 17.4                               | -11.1%                                |
| DNS           | 0             | N/A       | 0.282     | N/A                              | N/A                                | 14.7                               | N/A                                   |
| DNS           | 1             | N/A       | 0.257     | N/A                              | N/A                                | 15.5                               | N/A                                   |
| DNS           | 2             | N/A       | 0.288     | N/A                              | N/A                                | 10.0                               | N/A                                   |

**Supplementary Table S2. FTA case (sample #7)**

| Cell No. (MA) | Cell No. (AU) | Fpol (MA) | Fpol (AU) | Fpol % Difference (MA versus AU) | Cell Area (MA) ( $\mu\text{m}^2$ ) | Cell Area (AU) ( $\mu\text{m}^2$ ) | Cell Area % Difference (MA versus AU) |
|---------------|---------------|-----------|-----------|----------------------------------|------------------------------------|------------------------------------|---------------------------------------|
| 1             | 0             | 0.103     | 0.100     | -3.0%                            | 50.2                               | 48.9                               | -2.6%                                 |
| 2             | 1             | 0.113     | 0.116     | 2.6%                             | 30.3                               | 34.1                               | 11.0%                                 |
| 3             | 2             | 0.162     | 0.150     | -8.0%                            | 48.6                               | 60.7                               | 19.9%                                 |
| 4             | 3             | 0.170     | 0.190     | 10.5%                            | 29.8                               | 23.4                               | -27.2%                                |

**Supplementary Table S3. FTC case (sample #5)**

| <b>Cell No. (MA)</b> | <b>Cell No. (AU)</b> | <b>Fpol (MA)</b> | <b>Fpol (AU)</b> | <b>Fpol % Difference (MA versus AU)</b> | <b>Cell Area (MA) (<math>\mu\text{m}^2</math>)</b> | <b>Cell Area (AU) (<math>\mu\text{m}^2</math>)</b> | <b>Cell Area % Difference (MA versus AU)</b> |
|----------------------|----------------------|------------------|------------------|-----------------------------------------|----------------------------------------------------|----------------------------------------------------|----------------------------------------------|
| 1                    | DNS                  | 0.276            | N/A              | N/A                                     | 21.3                                               | N/A                                                | N/A                                          |
| 2                    | 10                   | 0.325            | 0.321            | -1.2%                                   | 25.1                                               | 18.0                                               | -39.6%                                       |
| 3                    | 15                   | 0.284            | 0.308            | 7.8%                                    | 26.5                                               | 17.4                                               | -52.4%                                       |
| 4                    | 0                    | 0.284            | 0.276            | -2.9%                                   | 11.2                                               | 8.0                                                | -39.4%                                       |
| 5                    | 2                    | 0.281            | 0.296            | 5.1%                                    | 15.7                                               | 12.0                                               | -31.2%                                       |
| 6                    | 5                    | 0.297            | 0.314            | 5.4%                                    | 15.1                                               | 9.7                                                | -55.2%                                       |
| 7                    | 3                    | 0.296            | 0.309            | 4.2%                                    | 16.0                                               | 12.8                                               | -24.6%                                       |
| 8                    | 4                    | 0.296            | 0.304            | 2.6%                                    | 16.1                                               | 14.6                                               | -10.7%                                       |
| 9                    | 7                    | 0.300            | 0.295            | -1.7%                                   | 19.5                                               | 15.9                                               | -23.2%                                       |
| 10                   | 9                    | 0.318            | 0.311            | -2.3%                                   | 21.4                                               | 19.6                                               | -9.3%                                        |
| 11                   | 13                   | 0.309            | 0.299            | -3.3%                                   | 26.9                                               | 21.5                                               | -25.3%                                       |
| 12                   | 12                   | 0.298            | 0.293            | -1.7%                                   | 15.2                                               | 13.1                                               | -16.2%                                       |
| 13                   | 6                    | 0.297            | 0.294            | -1.0%                                   | 17.7                                               | 13.1                                               | -34.9%                                       |
| DNS                  | 1                    | N/A              | 0.294            | N/A                                     | N/A                                                | 7.9                                                | N/A                                          |
| DNS                  | 8                    | N/A              | 0.288            | N/A                                     | N/A                                                | 10.6                                               | N/A                                          |
| DNS                  | 11                   | N/A              | 0.301            | N/A                                     | N/A                                                | 15.5                                               | N/A                                          |
| DNS                  | 14                   | N/A              | 0.317            | N/A                                     | N/A                                                | 15.7                                               | N/A                                          |

**Supplementary Table S4. MTC case (sample #10)**

| Cell No. (MA) | Cell No. (AU) | Fpol (MA) | Fpol (AU) | Fpol % Difference (MA versus AU) | Cell Area (MA) ( $\mu\text{m}^2$ ) | Cell Area (AU) ( $\mu\text{m}^2$ ) | Cell Area % Difference (MA versus AU) |
|---------------|---------------|-----------|-----------|----------------------------------|------------------------------------|------------------------------------|---------------------------------------|
| 1             | 19            | 0.276     | 0.275     | -0.4%                            | 20.3                               | 19.857                             | -2.2%                                 |
| 2             | 18            | 0.225     | 0.228     | 1.3%                             | 24.0                               | 22.42                              | -7.0%                                 |
| 3             | 16            | 0.228     | 0.262     | 13.0%                            | 19.2                               | 14.057                             | -36.7%                                |
| 4             | DNS           | 0.287     | N/A       | N/A                              | 29.1                               | N/A                                | N/A                                   |
| 5             | 1             | 0.264     | 0.255     | -3.5%                            | 26.2                               | 29.27                              | 10.5%                                 |
| 6             | DNS           | 0.308     | N/A       | N/A                              | 16.0                               | N/A                                | N/A                                   |
| 7             | DNS           | 0.230     | N/A       | N/A                              | 25.8                               | N/A                                | N/A                                   |
| 8             | DNS           | 0.256     | N/A       | N/A                              | 20.3                               | N/A                                | N/A                                   |
| 9             | 2             | 0.268     | 0.293     | 8.5%                             | 28.9                               | 19.563                             | -47.8%                                |
| 10            | 5             | 0.229     | 0.242     | 5.4%                             | 20.7                               | 17.146                             | -20.6%                                |
| 11            | 6             | 0.281     | 0.302     | 7.0%                             | 41.1                               | 39.63                              | -3.7%                                 |
| 12            | 8             | 0.307     | 0.313     | 1.9%                             | 53.8                               | 58.541                             | 8.1%                                  |
| 13            | 7             | 0.278     | 0.310     | 10.3%                            | 27.1                               | 25.698                             | -5.5%                                 |
| 14            | 15            | 0.304     | 0.327     | 7.0%                             | 25.83                              | 22.042                             | -17.2%                                |
| 15            | 12            | 0.335     | 0.317     | -5.7%                            | 41.525                             | 56.208                             | 26.1%                                 |
| 16            | 13            | 0.314     | 0.310     | -1.3%                            | 40.45                              | 51.46                              | 21.4%                                 |
| 17            | 10            | 0.299     | 0.316     | 5.4%                             | 35.375                             | 40.239                             | 12.1%                                 |
| 18            | 3             | 0.305     | 0.300     | -1.7%                            | 29.1                               | 30.069                             | 3.2%                                  |
| DNS           | 0             | N/A       | 0.246     | N/A                              | N/A                                | 19.878                             | N/A                                   |
| DNS           | 4             | N/A       | 0.241     | N/A                              | N/A                                | 10.926                             | N/A                                   |
| DNS           | 9             | N/A       | 0.311     | N/A                              | N/A                                | 50.493                             | N/A                                   |
| DNS           | 11            | N/A       | 0.308     | N/A                              | N/A                                | 108.719                            | N/A                                   |
| DNS           | 14            | N/A       | 0.333     | N/A                              | N/A                                | 28.703                             | N/A                                   |
| DNS           | 17            | N/A       | 0.314     | N/A                              | N/A                                | 25.53                              | N/A                                   |

## Supplementary Methods

We employed a relatively standard U-Net with five resolution levels: first with decreasing resolution in the analysis path and then increasing resolution in the synthesis paths. Each processing block consisted of two 3x3 unpadded convolutions followed by rectified linear activations. The down-sampling in the analysis path was achieved with 2x2 pooling with stride 2x2, and the up-sampling in the synthesis path was obtained with 2x2 up-convolutions with stride 2x2. The features from both paths were put together utilizing a concatenation step. This enabled the network to integrate coarse high-level features with a large spatial context and fine low-level texture information. This architecture resulted in a receptive field of 185 pixels in both spatial directions, which means that for the classification of each pixel a neighborhood of 92x92 pixels around the central pixel is involved. Both outputs, one for high-quality cells and one for low-quality cells, had two output channels and a softmax activation with binary cross-entropy loss. The number of channels in each level is listed in Supplementary Table S5.

**Supplementary Table S5:** Parameters of the convolutional layers in the analysis and synthesis path of the U-Net

| Level             | Analysis path | Synthesis path |
|-------------------|---------------|----------------|
| 01 (input/output) | 64            | 64             |
| 02                | 128           | 128            |
| 03                | 256           | 256            |
| 04                | 512           | 512            |
| 05                | 1024          |                |

The input to the network was a crop of size 572x572 pixels. The input image and label were mirrored at the border to include crops covering the entire 1000x1000 image extent. The architecture had 31 million trainable parameters. The network was trained for up to 300 epochs with learning with Adam optimizer and learning rate 0.01 and a batch size of four. The training process on an NVIDIA T4 GPU took about 8 hours.
